# Supplementary material for: A Real-time Quantitative Polymerase Chain Reaction for the Specific Detection of Hammondia Hammondi and Its Differentiation from Toxoplasma Gondii
Source: Research Square preprint supplement (doi:10.21203/rs.3.rs-117758/v1), 2020-12-02
Supplement: Supplementary file 1 [file f032f0cc670c457113053079.xlsx]

## Sheet: Tabelle1
Primer-forward	Primer-reverse	Mean ΔCtpos-neg	StD ΔCtpos-neg	Coefficient of variation of ΔCtpos-neg	Possible probes	T. gondii-cross-reaction	T. gondii-cross-reaction - old	Possible probes - old	Probes with RFUs > 1000	Mean Ct / Mean RFU (number of repetitions) using probe 55P	Mean Ct / Mean RFU (number of repetitions) using probe 110P	Mean Ct / Mean RFU (number of repetitions) using probe 222P
34F	157R	13.0462	4.05538	0.310849	55P, 75P, 110P	No		55P, 75P, 110P	55P, 110P	35.0 / 1134.1 (n=3)	35.3 / 1615.6 (n=4)	Probe out of target
34F	129R	10.4556	5.16043	0.493554	NA	NA		NA (55P, 75P)	NA	NA	NA	NA
34F	63R	9.69075	1.41223	0.145729	Probe out of target	NA		no probe possible	NA	NA	NA	NA
34F	81R	9.60265	7.67793	0.799564	NA	NA		no probe possible	NA	NA	NA	NA
34F	74R	9.26688	3.6576	0.394696	Probe out of target	NA		no probe possible	NA	NA	NA	NA
44F	129R	7.64471	1.74633	0.228436	75P	Yes	Yes	NA	NA	NA	NA	NA
1F	157R	7.44937	0.529644	0.0710992	55P, 75P, 110P	No		55P, 75P, 110P	None	NA	NA	NA
28F	158R	7.07733	1.23202	0.17408	75P	Yes	Yes	NA	NA	NA	NA	NA
28F	157R	6.82918	0.458771	0.0671781	75P	Yes	Yes	NA	NA	NA	NA	NA
17F	157R	6.71841	0.550423	0.0819275	55P, 75P, 110P	Yes	Yes	NA	NA	NA	NA	NA
17F	158R	6.44109	0.948806	0.147305	55P, 75P, 110P	Yes	Yes	NA	NA	NA	NA	NA
275F	81R	6.415	1.415	0.220577	222P	No		222P	222P	Probe out of target	Probe out of target	33.6 / 1124.6 (n=5)
17F	81R	6.29827	0.291503	0.0462831	Probe out of target	NA	Yes	NA	NA	NA	NA	NA
276F	129R	6.135	4.855	0.791361	NA	NA		NA	NA	NA	NA	NA
276F	157R	6.035	2.495	0.413422	NA	NA		NA (55P, 75P, 110P, 222P)	NA	NA	NA	NA
17F	74R	5.50512	2.00016	0.363327	Probe out of target	NA	Yes	NA	NA	NA	NA	NA
275F	157R	5.505	0.615	0.111717	55P, 75P, 110P, 222P	No		55P, 75P, 110P, 222P	None	NA	NA	NA
275F	158R	5.195	5.305	1.02117	NA	NA		NA	NA	NA	NA	NA
28F	129R	4.49083	0.226718	0.0504845	55P, 75P	Yes	Yes	NA	NA	NA	NA	NA
1F	129R	4.4363	0.441286	0.0994716	55P, 75P	No		55P, 75P	None	NA	NA	NA
276F	158R	4.215	0.745	0.17675	55P, 75P, 110P, 222P	No		55P, 75P, 110P, 222P	110P	NA	34.9 / 1033.3 (n=3)	NA
3F	74R	4.066	1.19203	0.29317	Probe out of target	NA		no probe possible	NA	NA	NA	NA
276F	63R	4.035	1.945	0.482032	NA	NA		NA	NA	NA	NA	NA
276F	74R	3.97	3.1	0.780856	NA	NA		NA	NA	NA	NA	NA
1F	74R	3.82405	0.29052	0.0759718	NA	NA		NA	NA	NA	NA	NA
276F	81R	3.75	1.91	0.509333	NA	NA		NA	NA	NA	NA	NA
275F	74R	3.64	3.34	0.917582	NA	NA		NA	NA	NA	NA	NA
34F	158R	3.6181	0.517378	0.142997	NA	NA		NA	NA	NA	NA	NA
3F	129R	3.56533	1.1035	0.30951	NA	NA		NA	NA	NA	NA	NA
275F	129R	3.51	1.83	0.521368	NA	NA		NA	NA	NA	NA	NA
3F	158R	3.17139	2.71806	0.857055	NA	NA		NA	NA	NA	NA	NA
17F	63R	3.04196	1.1044	0.363055	NA	NA	Yes	NA	NA	NA	NA	NA
1F	158R	2.96408	2.83445	0.956266	NA	NA		NA	NA	NA	NA	NA
275F	63R	2.86	2.03	0.70979	NA	NA		NA	NA	NA	NA	NA
62F	157R	2.78338	0.180875	0.064984	NA	NA		NA	NA	NA	NA	NA
28F	63R	1.90407	0.392934	0.206365	NA	NA	Yes	NA	NA	NA	NA	NA
17F	129R	1.90072	0.639068	0.336224	NA	NA	Yes	NA	NA	NA	NA	NA
3F	81R	1.81684	0.657471	0.361876	NA	NA		NA	NA	NA	NA	NA
62F	129R	1.77777	0.663686	0.373325	NA	NA		NA	NA	NA	NA	NA
1F	81R	1.75829	0.356002	0.202471	NA	NA		NA	NA	NA	NA	NA
3F	157R	1.28111	0.191735	0.149664	NA	NA		NA	NA	NA	NA	NA
28F	74R	1.19915	0.0954343	0.0795849	NA	NA	Yes	NA	NA	NA	NA	NA
55F	129R	0.926939	3.12748	3.37399	NA	NA		NA	NA	NA	NA	NA
28F	81R	0.794126	0.0246917	0.031093	NA	NA	Yes	NA	NA	NA	NA	NA
55F	157R	0.723898	0.150662	0.208125	NA	NA	Yes	NA	NA	NA	NA	NA
3F	63R	0.659774	0.374766	0.568022	NA	NA		NA	NA	NA	NA	NA
44F	157R	0.463589	0.0421707	0.0909659	NA	NA	Yes	NA	NA	NA	NA	NA
55F	158R	0.462114	0.112782	0.244057	NA	NA	Yes	NA	NA	NA	NA	NA
1F	63R	0.135438	0.411898	3.04124	NA	NA		NA	NA	NA	NA	NA
62F	158R	0.120793	0.35969	2.97773	NA	NA		NA	NA	NA	NA	NA
44F	158R	-0.167588	0.0630943	-0.376485	NA	NA	Yes	NA	NA	NA	NA	NA
